# Supplementary material for: Impact of social and technological distraction on pedestrian crossing behaviour: an observational study
Source: PubMed Central journal article supplement — Inj Prev. 2012 Dec 13;19(4):232–7. doi: 10.1136/injuryprev-2012-040601 (PMC3717764; doi:10.1136/injuryprev-2012-040601), 2012-12-13
Supplement: injuryprev-2012-040601-s2.pdf [file injuryprev-2012-040601-s2.pdf]

Appendix 2: Data Coding Form

|                                                           | Recorded Variable                                                                                                                         | Notes                                                                                                                                                                                                      |
|-----------------------------------------------------------|-------------------------------------------------------------------------------------------------------------------------------------------|------------------------------------------------------------------------------------------------------------------------------------------------------------------------------------------------------------|
| Date                                                      | Date                                                                                                                                      |                                                                                                                                                                                                            |
| Observer ID                                               | Observer Initials                                                                                                                         |                                                                                                                                                                                                            |
| Pedestrian ID                                             | nnnnnn                                                                                                                                    | First 3 digits--intersection ID, next 3--pedestrian number at that intersection                                                                                                                            |
| Intersection Section (1 through 12)                       | n                                                                                                                                         | (1 through 8 for most intersections).<br>Direction Walking: Refers to which direction the individual is moving, with specific reference to landmarks of the intersection map on each data collection form. |
| Inches Crossed (Intersection width at crosswalk) (meters) | nn                                                                                                                                        | meters                                                                                                                                                                                                     |
| Lanes crossed by pedestrian                               | xxx                                                                                                                                       | number of lanes                                                                                                                                                                                            |
| Avg. Daily Car Volume                                     | xxx                                                                                                                                       | Recorded from city traffic database                                                                                                                                                                        |
| Gender                                                    | 1---male, 2---female                                                                                                                      |                                                                                                                                                                                                            |
| Age Group                                                 | 1---<18, 2---18-24, 3---25-44, 4---45-64, 5---65+                                                                                         | See coding key for descriptors                                                                                                                                                                             |
| Alone                                                     | 0 = alone, 1 = group, 2 = group talking                                                                                                   |                                                                                                                                                                                                            |
| Cross at Crosswalk                                        | 0 = no, 1 = yes, 8 = na                                                                                                                   |                                                                                                                                                                                                            |
| Look Both Ways                                            | 0 = no, 1 = yes, 8 = na                                                                                                                   |                                                                                                                                                                                                            |
| ObeyLights                                                | 0 = no, 1 = yes, 8 = na                                                                                                                   |                                                                                                                                                                                                            |
| Distraction                                               | 0---none, 1---mobile hand, 2--<br>-mobile hand talking, 3---<br>mobile earpiece, 4---text<br>keyboarding, 5---music<br>earbuds, 6---other |                                                                                                                                                                                                            |
| distraction_text                                          | \$string                                                                                                                                  |                                                                                                                                                                                                            |
| Look Approach. Car                                        | 0 = no, 1 = yes, 8 = na                                                                                                                   |                                                                                                                                                                                                            |
| Wait Approach. Car                                        | 0 = no, 1 = yes, 8 = na                                                                                                                   |                                                                                                                                                                                                            |
| Cross Time (s)                                            | n                                                                                                                                         |                                                                                                                                                                                                            |
| CrossTime_txt                                             | \$string                                                                                                                                  |                                                                                                                                                                                                            |
