# Supplementary material for: Impact of social and technological distraction on pedestrian crossing behaviour: an observational study
Source: PubMed Central journal article supplement — Inj Prev. 2012 Dec 13;19(4):232–7. doi: 10.1136/injuryprev-2012-040601 (PMC3717764; doi:10.1136/injuryprev-2012-040601), 2012-12-13
Supplement: injuryprev-2012-040601-s3.pdf [file injuryprev-2012-040601-s3.pdf]

### Appendix 3: Pedestrian Distraction Study Coding Sheet

**Direction Walking:** Refers to which direction the individual is moving, with specific reference to landmarks of the intersection

**Age Group:**

- <18: Middle or high school student, may carry a backpack, typically dressed casually
- 18-24: College-age or student, typically dressed casually
- 25-44: Adult, younger
- 45-64: Adult, middle age
- 65+ Older adult, early to late retirement age

**Alone/Group/Group-Talking:**

- Alone: individual walks without making intentional body contact or eye contact with other individuals
- Group: Individual makes eye contact or body contact and walking at a similar speed as another individual
  - Group-not talking: individual in group but is not conversing with anyone
  - Group-talking: observer can see individual's lips moving in communication (forming words), with group member

**Distraction:**

- Mobile-Phone: Individual has phone held to ear, or is observed to be using a headset with a speaking microphone attached
- Text-Keyboarding: Individual has phone out, is observed to interact with device, whether on a keyboard (typing) or touch screen (tapping), or by maintaining eye contact with the phone while walking (reading on the device).
- Music-Ear-buds: Individual observed to have ear-buds in his/her ears.
- Other: Individual is using a device in a manner which does not conform to any of the previous categories, or a device not mentioned
- None: Individual is not using any device

**Look Both Ways:** Observer can see a noticeable turn of the chin in both directions immediately before the pedestrian steps into roadway

**Cross at Crosswalk (if applicable):**

- Yes: Individual enters street at cross walk and does not take more than one step out of the painted crosswalk lines

**Obey Lights (if applicable):**

- Yes: Individual waits to step into the road until the walk signal is lit
- No: Individual enters road after the "don't cross" indicator has begun to flash

**Time to Cross:** The time from when both of an individual's feet enter the road to when both feet exit the road, in seconds
