# Supplementary figures and images for: Impact of social and technological distraction on pedestrian crossing behaviour: an observational study
Source: PubMed Central journal article supplement — Inj Prev. 2012 Dec 13;19(4):232–7. doi: 10.1136/injuryprev-2012-040601 (PMC3717764; doi:10.1136/injuryprev-2012-040601), 2012-12-13

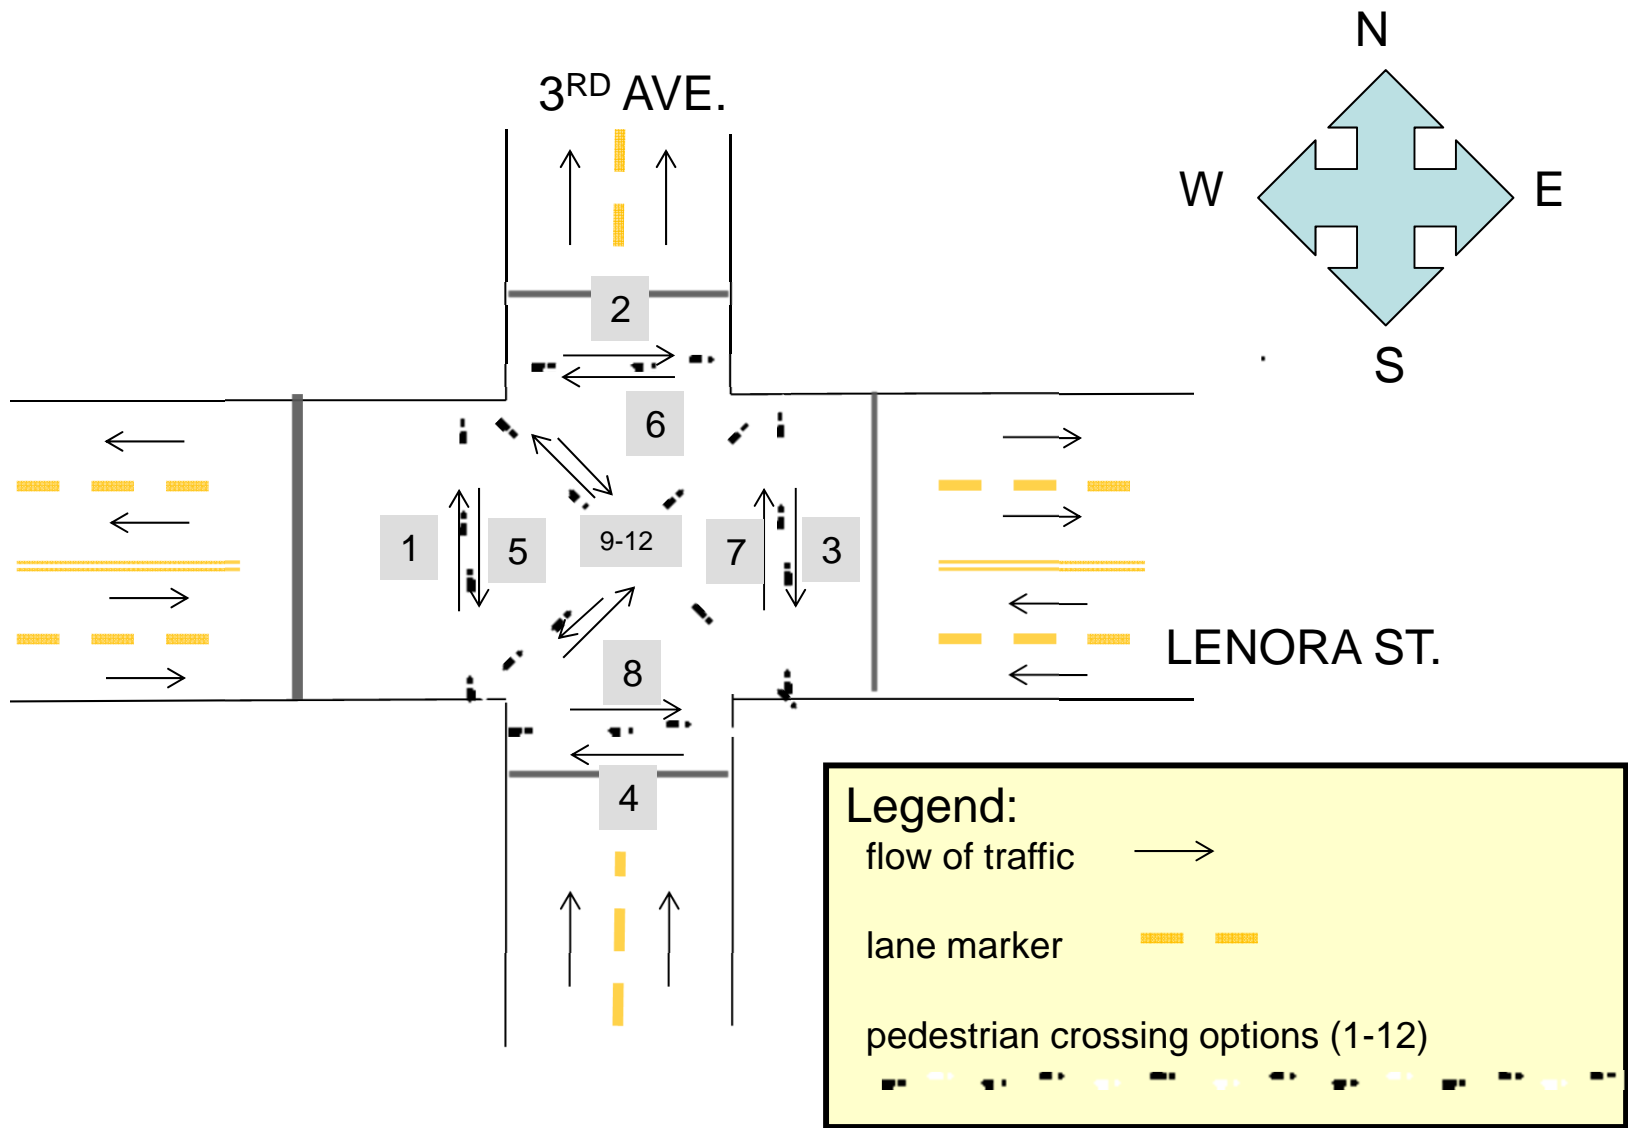

Appendix 1: Example diagram of a crossing intersection

Supplement: injuryprev-2012-040601-s1.pdf [file injuryprev-2012-040601-s1.pdf]
